# Supplementary material
Source: Royal Society of Chemistry journal article supplement (doi:10.1039/d6dt00203j)
Supplement: d6dt00203j1.pdf [file d6dt00203j1.pdf]

# LDH-mediated interfacial redox formation of phylломanganate from $\text{KMnO}_4$ : mechanistic insights and subsequent fluorination pathways

Abderraouf Rouag<sup>a</sup>, Sarah Hennequart<sup>a</sup>, Régis Porhiel<sup>a</sup>, Jean-Marc, Grenèche<sup>b</sup>, Kevin  
Lemoine<sup>a</sup>, Katia Guérin<sup>a</sup>, Diane Delbègue<sup>c</sup>, Fabrice Leroux<sup>a\*</sup>

- a. Université Clermont Auvergne, INP Clermont, CNRS, ICCF, 24, Avenue Blaise Pascal, 63178 Aubière, France.
- b. Institut des Molécules et des Matériaux du Mans, UMR 6283 CNRS, Le Mans Université, Avenue Olivier Messiaen, 72085 Le Mans Cedex 9, France
- c. Centre National des Etudes Spatiales, 18 avenue Edouard Belin 31 401 Toulouse Cedex 9, France.

---

## Supplementary Information

---

|                |                        | $\text{Fe}^{n+}$ | $\delta$ | $\Delta E_Q$ | $\tau$ |
|----------------|------------------------|------------------|----------|--------------|--------|
| <b>CCF-NO3</b> |                        |                  |          |              |        |
| 300 K          | 3 quadrupolar doublets | $\text{Fe}^{3+}$ | 0.35     | 0.68         | 0.51   |
|                |                        | $\text{Fe}^{3+}$ | 0.35     | 0.37         | 0.20   |
|                |                        | $\text{Fe}^{3+}$ | 0.36     | 1.12         | 0.29   |
| <b>CCF-Mn</b>  |                        |                  |          |              |        |
| 300 K          | 2 quadrupolar doublets | $\text{Fe}^{3+}$ | 0.35     | 0.63         | 0.60   |
|                |                        | $\text{Fe}^{3+}$ | 0.35     | 1.00         | 0.40   |

**Table S1** Refined values of the hyperfine parameters of LDH phases at 300 K.

**Table S2.** Summary of cell parameters of CCF-NO<sub>3</sub>-F<sub>2</sub> and CCF-Mn-F<sub>2</sub>

| Sample                                       | CCF-NO <sub>3</sub> F <sub>2</sub> |                  | CCF-Mn F <sub>2</sub>   |                  |                                               |
|----------------------------------------------|------------------------------------|------------------|-------------------------|------------------|-----------------------------------------------|
|                                              | CuF <sub>2</sub>                   | FeF <sub>3</sub> | CuF <sub>2</sub>        | FeF <sub>3</sub> | Mn <sub>2</sub> O <sub>2</sub> F <sub>9</sub> |
| Phase                                        |                                    |                  |                         |                  |                                               |
| Space group                                  | <i>P2<sub>1</sub>/n</i>            | <i>R-3c</i>      | <i>P2<sub>1</sub>/n</i> | <i>R-3c</i>      | <i>C2/c</i>                                   |
| <i>a</i> (Å)                                 | 3.318(1)                           | 5.166(1)         | 3.325(1)                | 5.089(1)         | 17.537(1)                                     |
| <i>b</i> (Å)                                 | 4.517(1)                           | 5.166(1)         | 4.528(1)                | 5.089(1)         | 8.397(1)                                      |
| <i>c</i> (Å)                                 | 4.591(1)                           | 13.356(1)        | 4.578(1)                | 13.265(1)        | 9.150(1)                                      |
| $\beta$ (°)                                  | 83.71(1)                           | 90.00            | 84.44(1)                | 90.00            | 102.39(1)                                     |
| <i>V</i> (Å <sup>3</sup> )                   | 68.37(1)                           | 308.68(1)        | 68.60(1)                | 297.42(1)        | 1316.03(1)                                    |
| 2 $\theta$ range (°)                         | 10–70                              |                  |                         |                  |                                               |
| Uni. reflec.                                 | 56                                 | 28               | 56                      | 28               | 560                                           |
| Ref. para.                                   | 66                                 | 58               | 72                      | 66               | 69                                            |
| $\chi^2$                                     | 3.5                                |                  | 7.3                     |                  |                                               |
| <i>R<sub>p</sub></i> / <i>R<sub>wp</sub></i> | 0.08/0.09                          |                  | 0.15/0.16               |                  |                                               |

**Table S3** Refined values of the hyperfine parameters of fluorinated phases at 300 K and 77 K.

|                      |                           | $\text{Fe}^{n+}$ | $\delta$ | $\Delta E_Q/2\varepsilon$ | $B_{\text{hf}}$ | $\tau$ |
|----------------------|---------------------------|------------------|----------|---------------------------|-----------------|--------|
| <b>CCF-NO3 - F2</b>  |                           |                  |          |                           |                 |        |
| 300 K                | 1 quadrupolar<br>doublet  | $\text{Fe}^{3+}$ | 0.45     | 0.51                      | -               | 0.21   |
|                      | 2 magnetic<br>sextets     | $\text{Fe}^{3+}$ | 0.49     | -0.06                     | 46.5            | 0.43   |
|                      |                           | $\text{Fe}^{3+}$ | 0.49     | 0.00                      | 40.5            | 0.36   |
| 77 K                 | 1 quadrupolar<br>doublet  | $\text{Fe}^{3+}$ | 0.55     | 0.58                      | -               | 32     |
|                      | 1 magnetic<br>sextet      | $\text{Fe}^{3+}$ | 0.59     | -0.045                    | 61.3            | 68     |
| <b>CCF - Mn - F2</b> |                           |                  |          |                           |                 |        |
| 300 K                | 2 quadrupolar<br>doublets | $\text{Fe}^{3+}$ | 0.50     | 1.19                      | -               | 0.15   |
|                      |                           | $\text{Fe}^{3+}$ | 0.44     | 0.37                      | -               | 0.53   |
|                      | 2 magnetic<br>sextets     | $\text{Fe}^{3+}$ | 0.49     | 0.00                      | 42.0            | 0.24   |
|                      |                           | $\text{Fe}^{3+}$ | 0.54     | 0.00                      | 37.9            | 0.08   |
| 77 K                 | 1 quadrupolar<br>doublet  | $\text{Fe}^{3+}$ | 0.53     | 0.48                      | -               | 0.38   |
|                      | 2 magnetic<br>sextets     | $\text{Fe}^{3+}$ | 0.59     | 0.00                      | 60.7            | 0.24   |
|                      |                           | $\text{Fe}^{3+}$ | 0.64     | 0.01                      | 58.7            | 0.38   |

$\delta$  ( $\pm 0.02$ ),  $\Delta E_Q$  ( $\pm 0.02$ ) and  $2\varepsilon$  ( $\pm 0.02$ ) are given in  $\text{mm}\cdot\text{s}^{-1}$ ,  $B_{\text{hf}}$  in T ( $\pm 0.5$ ),  $\tau$  ( $\pm 0.02$ ).
